# Supplementary material
Source: publisher figshare collection journal article supplement (https://karger.figshare.com/ndownloader/files/28911081)
Supplement: Supplementary file 1 [file 28911081]

Supplemental Table 4: Differentially expressed genes in the colon mucosa from CD patients treated with anti-TNF therapy.

| Gene | Before (mean) | After  (mean) | Log2  fold change | p-value |
| --- | --- | --- | --- | --- |
| CXCR5 | 16.7 | 6.4 | -1.392 | 0.002 |
| TLK2 | 66.3 | 48.3 | -0.456 | 0.004 |
| CD47 | 353.9 | 217.4 | -0.703 | 0.007 |
| CD79B | 171.3 | 47.1 | -1.864 | 0.010 |
| SAA1 | 82.8 | 11.6 | -2.841 | 0.013 |
| CCR7 | 24.5 | 5.1 | -2.253 | 0.015 |
| IRF4 | 317.9 | 165.3 | -0.943 | 0.016 |
| CXCL13 | 219.9 | 21.3 | -3.371 | 0.017 |
| LILRB1 | 74.6 | 21.5 | -1.795 | 0.020 |
| CCL19 | 260.7 | 35.5 | -2.876 | 0.023 |
| TOLLIP | 81.4 | 109.4 | 0.427 | 0.024 |
| IFI35 | 69.1 | 33.4 | -1.049 | 0.025 |
| CD19 | 113.6 | 33.1 | -1.778 | 0.026 |
| TAP2 | 227.6 | 111.1 | -1.034 | 0.028 |
| MCAM | 27.7 | 7.9 | -1.813 | 0.028 |
| CD38 | 110.8 | 49.5 | -1.162 | 0.030 |
| GZMH | 10.4 | 3.4 | -1.623 | 0.030 |
| IRF1 | 161.0 | 64.5 | -1.319 | 0.032 |
| IFIH1 | 52.2 | 26.8 | -0.964 | 0.034 |
| CASP8 | 109.2 | 73.1 | -0.578 | 0.037 |
| IL3RA | 23.0 | 4.7 | -2.301 | 0.037 |
| NOTCH1 | 59.2 | 42.8 | -0.467 | 0.038 |
| IL4R | 119.1 | 59.0 | -1.014 | 0.039 |
| IFI16 | 170.5 | 65.1 | -1.390 | 0.040 |
| GPATCH3 | 12.2 | 18.2 | 0.581 | 0.042 |
| BAX | 125.3 | 151.0 | 0.269 | 0.042 |
| BIRC5 | 41.5 | 28.9 | -0.521 | 0.043 |
| ISG15 | 53.1 | 14.2 | -1.900 | 0.047 |
| IFITM1 | 776.7 | 326.8 | -1.249 | 0.047 |
| STAT2 | 350.5 | 169.1 | -1.052 | 0.048 |
| CD37 | 30.0 | 9.5 | -1.652 | 0.048 |
| LTK | 7.7 | 15.5 | 1.019 | 0.049 |
| TUBB | 260.9 | 199.3 | -0.388 | 0.049 |
| ICAM3 | 166.0 | 94.0 | -0.821 | 0.049 |
